# Supplementary material for: Multiparametric Magnetic Resonance Imaging of Penile Cancer: A Pictorial Review
Source: MDPI journal article supplement (doi:10.3390/cancers15225324), 2023-11-08
Supplement: s1 [file s1]

Patient ID:

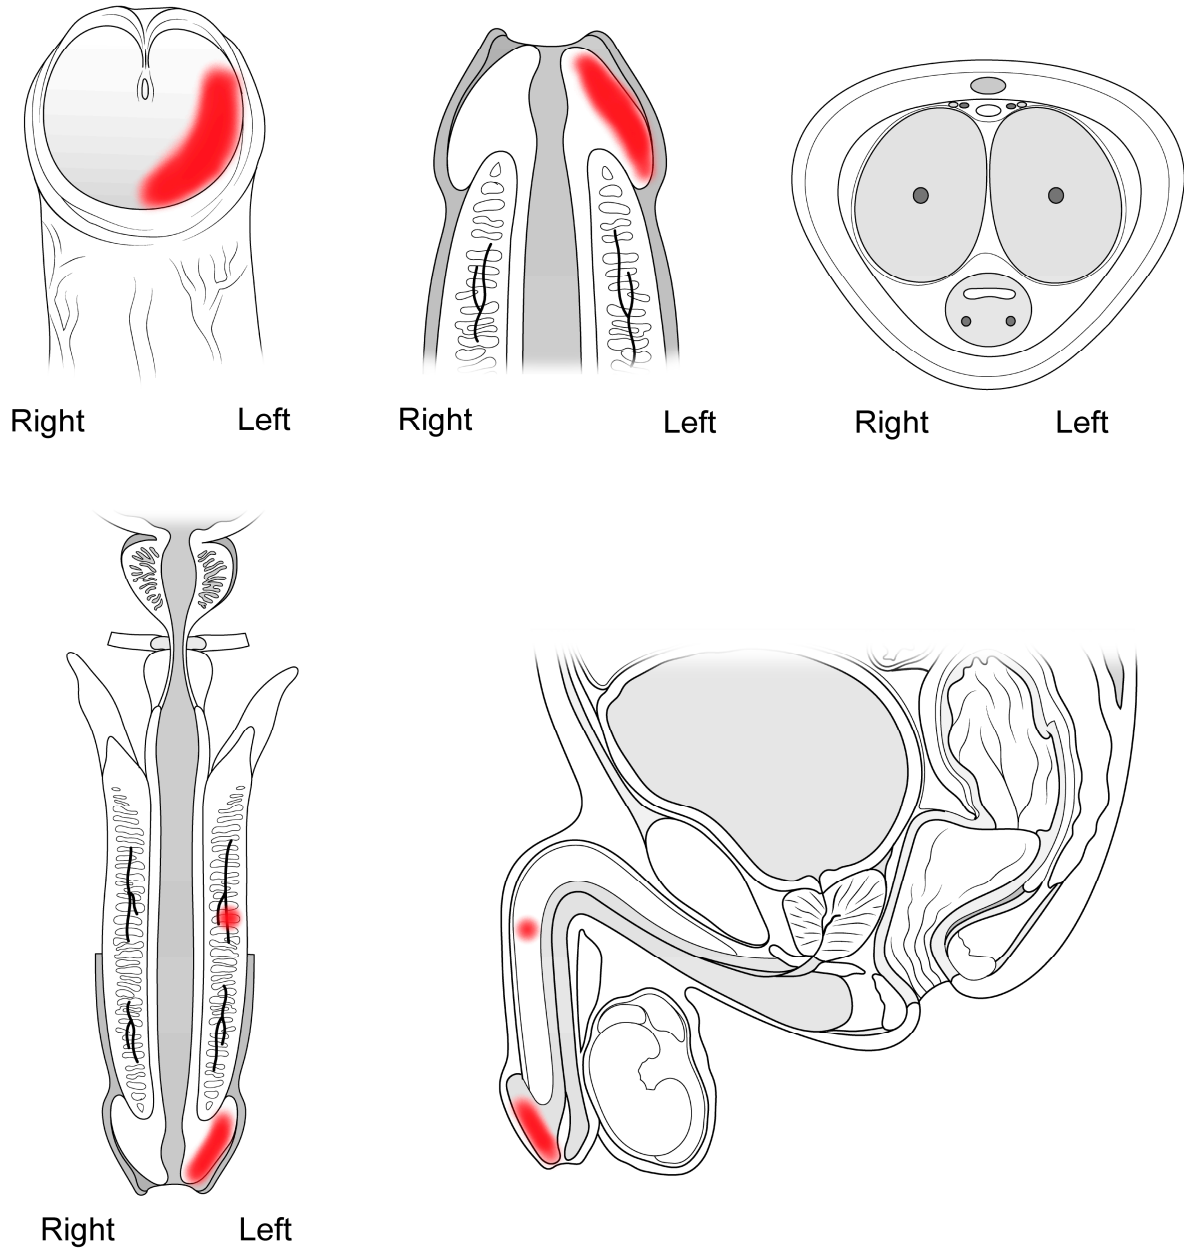

**Figure S1.** Example of the MRI template drawing to plot the penile cancer location.

**Table S1.** MpMRI protocol for the assessment of primary penile carcinoma (without DL, 3-T Vida Fit, Siemens)

| MpMRI parameters              | T2W           | DWI<br>RESOLVE                      | DWI                                            | DCE-MRI<br>TWIST-VIBE  | T1W after Gd                                   |
|-------------------------------|---------------|-------------------------------------|------------------------------------------------|------------------------|------------------------------------------------|
| Pulse sequence                | 2D SE         | Small FOV multi-shot EPI            | STIR-EPI                                       | 3D spoiled GE<br>Dixon | 3D spoiled GE<br>Dixon                         |
| Coverage area                 | Primary tumor | Primary tumor                       | Primary tumor, inguinal and pelvic lymph nodes | Primary tumor          | Primary tumor, inguinal and pelvic lymph nodes |
| Plane                         | Sag, Cor, Tra | Sag, Cor, Tra                       | Tra                                            | Tra                    | Tra                                            |
| Slice thickness (mm)          |               |                                     |                                                |                        |                                                |
| Acquired                      |               |                                     |                                                |                        |                                                |
| Interpolated                  | 2.0           | 2.3                                 | 5.0                                            | 2.2<br>1.1             | 1.2<br>0.6                                     |
| FOV (mm)                      | 230           | 150                                 | 370                                            | 169                    | 306                                            |
| TE (ms)                       | 99            | 56                                  | 64                                             | 1.35 and 2.58          | 2.46 and 3.69                                  |
| TR (ms)                       | 2430          | 2910                                | 7190                                           | 4.4                    | 5.8                                            |
| TI (ms)                       | -             | -                                   | 240                                            | -                      | -                                              |
| Flip angle                    | 128°          | 180°                                | -                                              | 13°                    | 12°                                            |
| Gap (mm)                      | 0.0           | 0.76                                | 1.0                                            | 0.44                   | 0.24                                           |
| NEX                           | 2             | b0 = 2<br>b800 = 4                  | b0 = 3<br>b800 = 3                             | 1                      | 2                                              |
| In-plane resolution (mm x mm) |               |                                     |                                                |                        |                                                |
| Acquired                      | 0.72 x 0.72   | 1.47 x 1.47                         | 2.5 x 2.5                                      | 1.32 x 1.32            | 0.82 x 0.74                                    |
| Interpolated                  | 0.36 x 0.36   | 0.74 x 0.74                         | 1.25 x 1.25                                    | 0.66 x 0.66            | 0.37 x 0.37                                    |
| ETL                           | 17            | 69                                  | 120                                            | -                      | -                                              |
| Bandwidth (Hz/Px)             | 313           | 980                                 | 2112                                           | 810                    | 670                                            |
| Matrix                        |               |                                     |                                                |                        |                                                |
| Acquired                      | 320 x 320     | 102 x 102                           | 148 x 148                                      | 128 x 128              | 416 x 374                                      |
| Interpolated                  | 640 x 640     | 204 x 204                           | 296 x 296                                      | 256 x 256              | 832 x 748                                      |
| R-factor                      | 2             | 2                                   | 2                                              | 4                      | 4                                              |
| b-values                      | -             | Acquired 0 and 800, calculated 1400 | Acquired 0 and 800                             | -                      | -                                              |
| Time resolution (sec)         | -             | -                                   | -                                              | 9.38                   | -                                              |
| Acquisition time (min)        | 2:52          | 3:40                                | 2:17                                           | 5:12                   | 6:05                                           |

MpMRI - multiparametric magnetic resonance imaging, DL - deep learning, RESOLVE - readout segmentation of long variable echo-trains, TWIST - time-resolved angiography with interleaved stochastic trajectories, VIBE - volume-interpolated breath-hold examination, DWI - diffusion-weighted imaging, DCE-MRI - dynamic contrast-enhanced magnetic resonance imaging, Gd – gadolinium, SE - spin echo, FOV - field of view, EPI - echo-planar imaging, STIR - short tau inversion recovery, GE - gradient echo, Sag – sagittal, Cor – coronal, Tra – transversal, TE - echo time, TR - repetition time, TI - inversion time, NEX - number of excitations, ETL - echo train length, R-factor - reduction factor using parallel imaging acceleration.

**Table S2.** MpMRI protocol for the assessment of primary penile carcinoma (with DL, 3-T Vida Fit, Siemens)

| MpMRI parameters              | T2W DL        | DWI RESOLVE                         | DWI                                            | DCE-MRI TWIST-VIBE  | T1W after Gd                                   |
|-------------------------------|---------------|-------------------------------------|------------------------------------------------|---------------------|------------------------------------------------|
| Pulse sequence                | 2D SE         | Small FOV multi-shot EPI            | STIR-EPI                                       | 3D spoiled GE Dixon | 3D spoiled GE Dixon                            |
| Coverage area                 | Primary tumor | Primary tumor                       | Primary tumor, inguinal and pelvic lymph nodes | Primary tumor       | Primary tumor, inguinal and pelvic lymph nodes |
| Plane                         | Sag, Cor, Tra | Sag, Cor, Tra                       | Tra                                            | Tra                 | Tra                                            |
| Slice thickness (mm)          |               |                                     |                                                |                     |                                                |
| Acquired                      |               |                                     |                                                |                     |                                                |
| Interpolated                  | 2.0           | 2.3                                 | 5.0                                            | 2.2                 | 1.2                                            |
| FOV (mm)                      | 230           | 149                                 | 300 x 370                                      | 169                 | 300 x 306                                      |
| TE (ms)                       | 99            | 55                                  | 64                                             | 1.35 and 2.58       | 2.46 and 3.69                                  |
| TR (ms)                       | 2620          | 3040                                | 7190                                           | 4.4                 | 5.83                                           |
| TI (ms)                       | -             | -                                   | 240                                            | -                   | -                                              |
| Flip angle                    | 128°          | 180°                                | -                                              | 13°                 | 12°                                            |
| Gap (mm)                      | 0.0           | 0.76                                | 1.0                                            | 0.44                | 0.24                                           |
| NEX                           | 1             | b0 = 2<br>b800 = 4                  | b0 = 3<br>b800 = 3                             | 1                   | 2                                              |
| In-plane resolution (mm x mm) |               |                                     |                                                |                     |                                                |
| Acquired                      | 0.72 x 0.72   | 1.47 x 1.47                         | 2.5 x 2.5                                      | 1.32 x 1.32         | 0.74 x 0.82                                    |
| Interpolated                  | 0.36 x 0.36   | 0.74 x 0.74                         | 1.25 x 1.25                                    | 0.66 x 0.66         | 0.37 x 0.37                                    |
| ETL                           | 19            | 69                                  | 60                                             | -                   | -                                              |
| Bandwidth (Hz/Px)             | 422           | 980                                 | 2111                                           | 810                 | 668                                            |
| Matrix                        |               |                                     |                                                |                     |                                                |
| Acquired                      | 320 x 320     | 102 x 102                           | 120 x 148                                      | 128 x 128           | 374 x 416                                      |
| Interpolated                  | 640 x 640     | 204 x 204                           | 296 x 296                                      | 256 x 256           | 748 x 832                                      |
| R-factor                      | 4             | 2                                   | 2                                              | 4                   | 4                                              |
| b-values                      | -             | Acquired 0 and 800, calculated 1400 | Acquired 0 and 800                             | -                   | -                                              |
| Time resolution (sec)         | -             | -                                   | -                                              | 9.38                | -                                              |
| Acquisition time (min)        | 1:20          | 3:50                                | 2:22                                           | 5:12                | 6:05                                           |

MpMRI - multiparametric magnetic resonance imaging, DL - deep learning, RESOLVE - readout segmentation of long variable echo-trains, TWIST - time-resolved angiography with interleaved stochastic trajectories, VIBE - volume-interpolated breath-hold examination, DWI - diffusion-weighted imaging, DCE-MRI - dynamic contrast-enhanced magnetic resonance imaging, Gd – gadolinium, SE - spin echo, FOV - field of view, EPI - echo-planar imaging, STIR - short tau inversion recovery, GE - gradient echo, Sag – sagittal, Cor – coronal, Tra – transversal, TE - echo time, TR - repetition time, TI - inversion time, NEX - number of excitations, ETL - echo train length, R-factor - reduction factor using parallel imaging acceleration.

**Table S3.** MpMRI protocol for the assessment of primary penile carcinoma (with DL, 1.5-T Sola, Siemens)

| MpMRI parameters              | T2W DL        | DWI<br>ZOOMit <sup>PRO</sup>        | DWI                                            | DCE-MRI<br>TWIST-VIBE  | T1W after Gd                                   |
|-------------------------------|---------------|-------------------------------------|------------------------------------------------|------------------------|------------------------------------------------|
| Pulse sequence                | 2D SE         | Reduced FOV EPI                     | STIR-EPI                                       | 3D spoiled GE<br>Dixon | 3D spoiled GE<br>Dixon                         |
| Coverage area                 | Primary tumor | Primary tumor                       | Primary tumor, inguinal and pelvic lymph nodes | Primary tumor          | Primary tumor, inguinal and pelvic lymph nodes |
| Plane                         | Sag, Cor, Tra | Sag, Cor, Tra                       | Tra                                            | Tra                    | Tra                                            |
| Slice thickness (mm)          |               |                                     |                                                |                        |                                                |
| Acquired                      |               |                                     |                                                |                        |                                                |
| Interpolated                  | 2.0           | 2.3                                 | 5.0                                            | 2.2<br>1.1             | 1.4<br>0.7                                     |
| FOV (mm)                      | 230           | 150                                 | 250 x 370                                      | 200                    | 300 x 306                                      |
| TE (ms)                       | 94            | 71                                  | 63                                             | 2.39 and 4.77          | 2.39 and 4.77                                  |
| TR (ms)                       | 2820          | 2800                                | 5180                                           | 6.4                    | 6.8                                            |
| TI (ms)                       | -             | -                                   | 180                                            | -                      | -                                              |
| Flip angle                    | 110°          | -                                   | -                                              | 13°                    | 10°                                            |
| Gap (mm)                      | 0.0           | 0.58                                | 0.0                                            | 0.44                   | 0.28                                           |
| NEX                           | 2             | b0 = 8<br>b800 = 16                 | b0 = 3<br>b800 = 6                             | 1                      | 2                                              |
| In-plane resolution (mm x mm) |               |                                     |                                                |                        |                                                |
| Acquired                      | 0.80 x 0.80   | 1.47 x 1.47                         | 2.98 x 2.98                                    | 1.56 x 1.56            | 0.74 x 0.82                                    |
| Interpolated                  | 0.40 x 0.40   | 0.74 x 0.74                         | 1.49 x 1.49                                    | 0.78 x 0.78            | 0.37 x 0.37                                    |
| ETL                           | 17            | 51                                  | 42                                             | -                      | -                                              |
| Bandwidth (Hz/Px)             | 285           | 1401                                | 2122                                           | 810                    | 670                                            |
| Matrix                        |               |                                     |                                                |                        |                                                |
| Acquired                      | 288 x 288     | 102 x 102                           | 84 x 124                                       | 128 x 128              | 367 x 416                                      |
| Interpolated                  | 576 x 576     | 204 x 204                           | 168 x 248                                      | 256 x 256              | 734 x 832                                      |
| R-factor                      | 4             | 2                                   | 2                                              | 4                      | 4                                              |
| b-values                      | -             | Acquired 0 and 800, calculated 1400 | Acquired 0 and 800                             | -                      | -                                              |
| Time resolution (sec)         | -             | -                                   | -                                              | 11.60                  | -                                              |
| Acquisition time (min)        | 2:33          | 3:33                                | 2:06                                           | 5:15                   | 6:04                                           |

MpMRI - multiparametric magnetic resonance imaging, DL - deep learning, TWIST - time-resolved angiography with interleaved stochastic trajectories, VIBE - volume-interpolated breath-hold examination, DWI - diffusion-weighted imaging, DCE-MRI - dynamic contrast-enhanced magnetic resonance imaging, Gd – gadolinium, SE - spin echo, FOV - field of view, EPI - echo-planar imaging, STIR - short tau inversion recovery, GE - gradient echo, Sag – sagittal, Cor – coronal, Tra – transversal, TE - echo time, TR - repetition time, TI - inversion time, NEX - number of excitations, ETL - echo train length, R-factor - reduction factor with parallel imaging acceleration.
